# Supplementary material for: Disposable multiplexed electrochemical sensors based on electro-triggered selective immobilization of probes for simultaneous detection of DNA and proteins
Source: Royal Society of Chemistry journal article supplement (doi:10.1039/d0tb01532f), 2020-01-01
Supplement: d0tb01532f1.pdf [file d0tb01532f1.pdf]

Electronic Supplementary Material (ESI) for Journal of Materials Chemistry B.  
This journal is © The Royal Society of Chemistry 2020

Electronic Supplementary Information

**Disposable multiplexed electrochemical sensors based on electro-triggered selective immobilization of probes for simultaneous detection of DNA and proteins**

Jinlong Fan,<sup>†a</sup> Ying Tang,<sup>†b</sup> Weiwei Yang,<sup>a\*</sup> and Yongsheng Yu<sup>a\*</sup>

<sup>a</sup> MIIT Key Laboratory of Critical Materials Technology for New Energy Conversion and Storage, School of Chemistry and Chemical Engineering, Harbin Institute of Technology, Harbin, Heilongjiang 150001, P. R. China

<sup>b</sup> Department of Neurology, The First Affiliated Hospital of Harbin Medical University, Harbin, Heilongjiang 150001, P. R. China.

\* Corresponding author.

\*E-mail: [yangww@hit.edu.cn](mailto:yangww@hit.edu.cn)

[yuys@hit.edu.cn](mailto:yuys@hit.edu.cn)

<sup>†</sup> These authors contributed equally to this work.

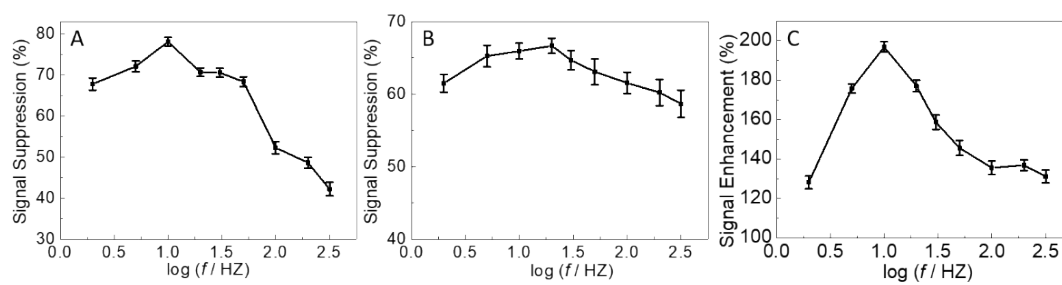

Figure S1. Effect of AC frequency on the signal responses upon target for (A) p53 sensor, (B) thrombin-aptamer sensor and (C) VEGF<sub>165</sub>-aptamer sensor. Conditions: AC amplitude, 25 mV; Phys 2 buffer, pH 7.4.

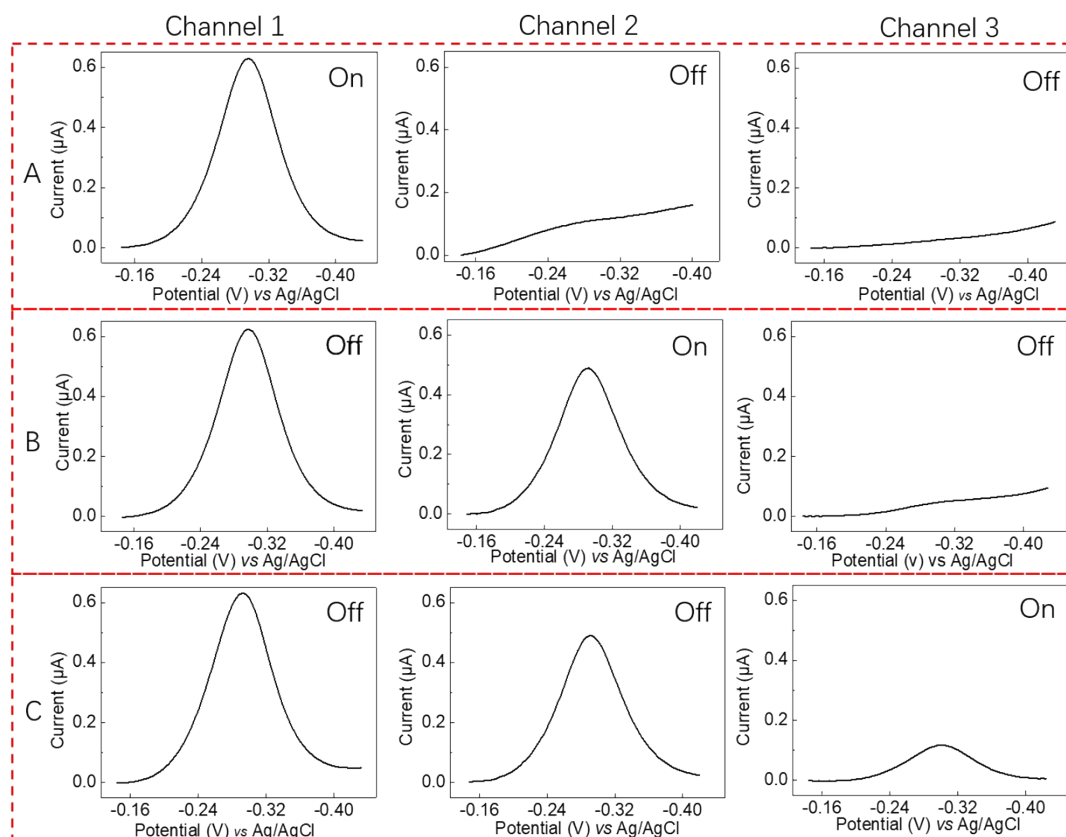

Figure S2. The initial AC voltammograms of the multiplexed sensor by controlling the electrode potential. (A) Only the working electrode in channel 1 (W1) was biased at -0.4 V (vs. Ag/AgCl), and the remaining two working electrodes (W2 and W3) were not connected (B) Only W2 was biased at -0.4 V (vs. Ag/AgCl), and the remaining two working electrodes (W1 and W3) were not connected (C) Only W3 was biased at -0.4 V (vs. Ag/AgCl), and the remaining two working electrodes (W1 and W2)

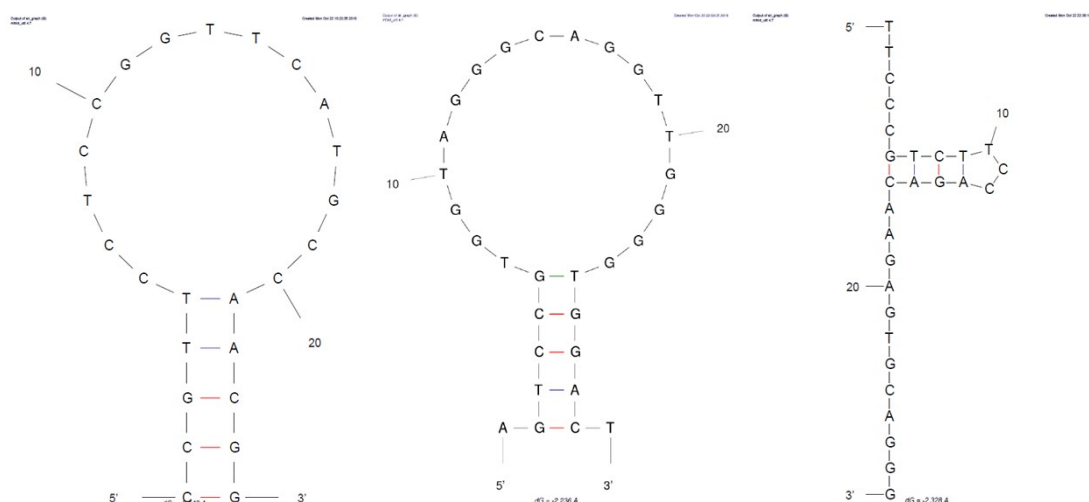

Figure S3. The lowest energy structures of the *p53* probe (left), thrombin aptamer (center) and VEGF<sub>165</sub> aptamer (right) as predicted by m-Fold. The simulation was performed at 25°C and in presence of 0.1 M Na<sup>+</sup> and 0.005 M Mg<sup>2+</sup>. As observed, the *p53* probe and thrombin aptamer have a stem-loop structure that is absent in the VEGF<sub>165</sub> aptamer. The structure mentioned above affects the initial currents in the sensor array.
